# Supplementary material for: The Structure of Relationships between the Human Exposome and Cardiometabolic Health: The Million Veteran Program
Source: MDPI journal article supplement (doi:10.3390/nu13041364), 2021-04-19

**The structure of relationships between the human exposome and  
cardiometabolic health: The Million Veteran Program**

**SUPPLEMENTARY INFORMATION**

**Table S1:** Number of participants excluded based on use of antilipemic, antihypertensive and/or hypoglycemic medications during either the exposure-assessment or outcome-assessment periods

---

|                                                                          | <b>Number excluded</b> |
|--------------------------------------------------------------------------|------------------------|
| <b>Use of antilipemic, antihypertensive and hypoglycemic medications</b> | 14,943                 |
| <b>Use of antilipemic and antihypertensive medications</b>               | 12,286                 |
| <b>Use of antilipemic and hypoglycemic medications</b>                   | 53,776                 |
| <b>Use of antihypertensive and hypoglycemic medications</b>              | 1,471                  |
| <b>Use of antilipemic medications only</b>                               | 85,233                 |
| <b>Use of antihypertensive medications only</b>                          | 5,940                  |
| <b>Use of hypoglycemic medications only</b>                              | 8,714                  |

---

**Table S2:** Additional baseline characteristics of all Million Veterans Program participants included in this study

|                                                             | Value        |
|-------------------------------------------------------------|--------------|
| <b>DEMOGRAPHICS</b>                                         |              |
| Previous smoking ( <i>number of cigarettes smoked/day</i> ) | 1.37 ± 1.52  |
| Hispanic or Latino (%)                                      | 6            |
| Body mass index ( <i>kg/m<sup>2</sup></i> )                 | 27.91 ± 5.37 |
| <b>DIETARY INTAKE</b>                                       |              |
| <b>Dairy</b>                                                |              |
| Yogurt ( <i>serves/day</i> )                                | 0.23 ± 0.46  |
| Ice cream ( <i>serves/day</i> )                             | 0.20 ± 0.38  |
| Cottage Cheese ( <i>serves/day</i> )                        | 0.08 ± 0.24  |
| Other cheese ( <i>serves/day</i> )                          | 0.46 ± 0.58  |
| Butter ( <i>serves/day</i> )                                | 0.39 ± 0.68  |
| <b>Meat</b>                                                 |              |
| Eggs ( <i>serves/day</i> )                                  | 0.43 ± 0.57  |
| Chicken with skin on ( <i>serves/day</i> )                  | 0.25 ± 0.40  |
| Chicken without skin ( <i>serves/day</i> )                  | 0.27 ± 0.36  |
| Liver ( <i>serves/day</i> )                                 | 0.01 ± 0.11  |
| Fish ( <i>serves/day</i> )                                  | 0.17 ± 0.28  |
| <b>Sweets and other foods</b>                               |              |
| Nuts ( <i>serves/day</i> )                                  | 0.30 ± 0.51  |
| Peanut butter ( <i>serves/day</i> )                         | 0.25 ± 0.43  |
| Chocolate ( <i>serves/day</i> )                             | 0.28 ± 0.50  |
| Candy ( <i>serves/day</i> )                                 | 0.14 ± 0.39  |
| Cookies ( <i>serves/day</i> )                               | 0.22 ± 0.48  |
| Margarine ( <i>serves/day</i> )                             | 0.32 ± 0.61  |
| Dressing ( <i>serves/day</i> )                              | 0.21 ± 0.37  |

**Grains**

|                                   |             |
|-----------------------------------|-------------|
| Cold cereal ( <i>serves/day</i> ) | 0.33 ± 0.47 |
| White bread ( <i>serves/day</i> ) | 0.27 ± 0.55 |
| Dark bread ( <i>serves/day</i> )  | 0.39 ± 0.60 |
| Rice ( <i>serves/day</i> )        | 0.27 ± 0.36 |

**Non-alcoholic beverages**

|                                                  |             |
|--------------------------------------------------|-------------|
| Coffee ( <i>serves/day</i> )                     | 1.30 ± 1.46 |
| Tea ( <i>serves/day</i> )                        | 0.39 ± 0.85 |
| Diet carbonated beverages ( <i>serves/day</i> )  | 0.27 ± 0.72 |
| Sugar carbonated beverages ( <i>serves/day</i> ) | 0.22 ± 0.60 |
| Fruit drinks ( <i>serves/day</i> )               | 0.17 ± 0.48 |
| Orange or grapefruit juice ( <i>serves/day</i> ) | 0.27 ± 0.5  |

**Vegetables**

|                                    |             |
|------------------------------------|-------------|
| Tomato ( <i>serves/day</i> )       | 0.31 ± 0.44 |
| Raw carrot ( <i>serves/day</i> )   | 0.20 ± 0.37 |
| Baked potato ( <i>serves/day</i> ) | 0.22 ± 0.29 |

**Fruit**

|                                   |             |
|-----------------------------------|-------------|
| Bananas ( <i>serves/day</i> )     | 0.41 ± 0.53 |
| Other fruit ( <i>serves/day</i> ) | 0.36 ± 0.56 |

**PHYSICAL INACTIVITY**

|                                           |               |
|-------------------------------------------|---------------|
| Playing video games ( <i>hours/week</i> ) | 1.55 ± 6.81   |
| Using a computer ( <i>hours/week</i> )    | 16.19 ± 21.27 |
| Watching TV ( <i>hours/week</i> )         | 21.36 ± 21.78 |

---

*Number of participants: 36,496*

*Results are mean ± standard deviation or %, where appropriate*

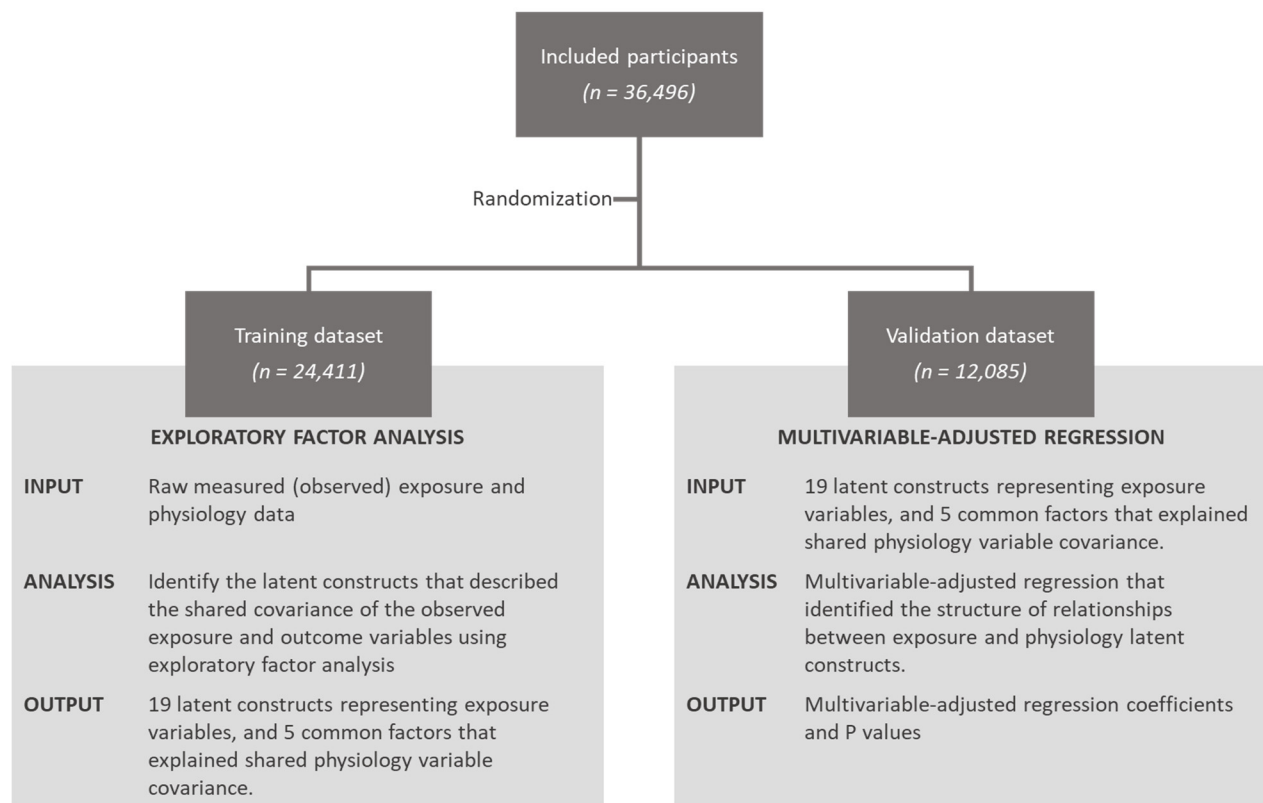

**Figure S1:** Schematic overview of the training and validation datasets.

Observed exposure variables

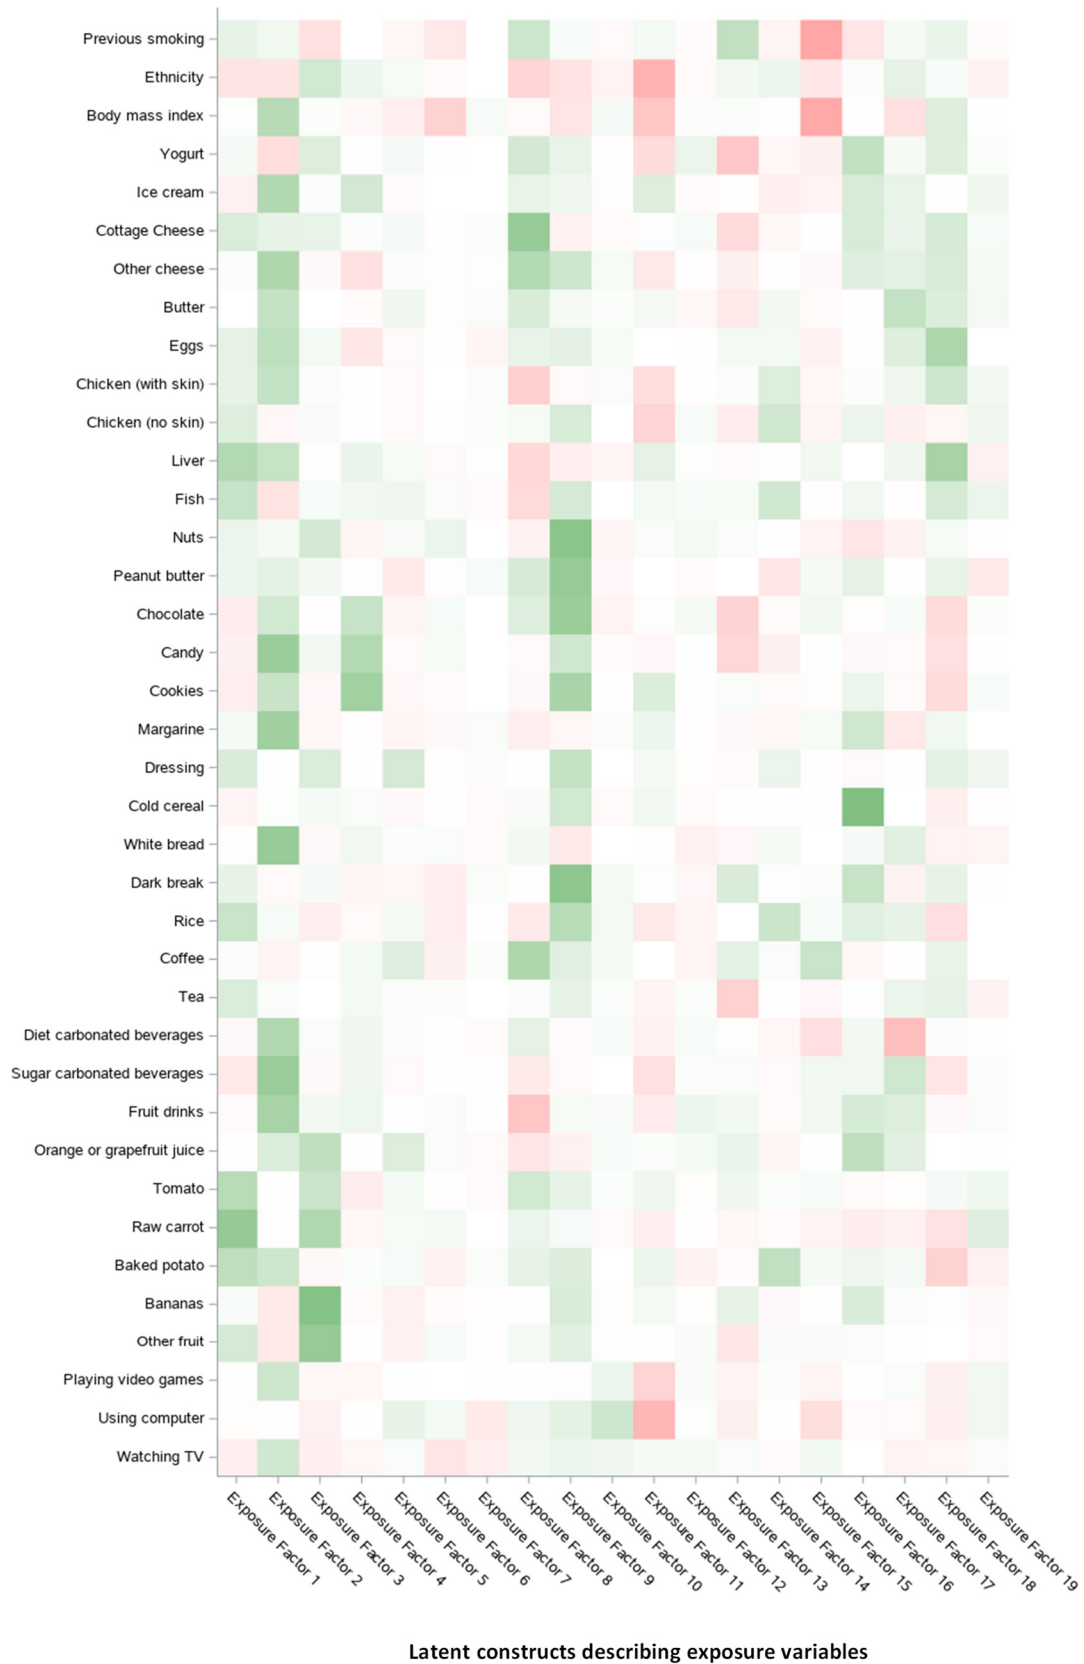

**Figure S2:** Rotated factor pattern based on tetrachoric and polychoric, common exploratory factor analysis of measured exposure variables in the training dataset; limited to observed (measured) variables that did not have a standardized regression coefficient  $\geq 0.5$  for at least one latent construct.

*Number of participants: 24,411*

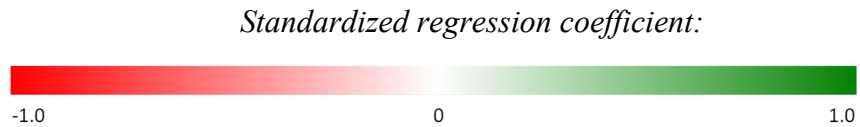

Supplement: s1 [file s1]
